# Supplementary material for: Reduced corrosion of Zn alloy by HA nanorods for enhancing early bone regeneration
Source: Royal Society of Chemistry journal article supplement (doi:10.1039/d3bm01690k), 2023-12-27
Supplement: d3bm01690k1.pdf [file d3bm01690k1.pdf]

## Supporting Information

### Reduced corrosion of Zn alloy by HA nanorods for enhancing early bone regeneration

Mengting Mao<sup>1</sup>, Jun Chen<sup>2</sup>, Fuwei Liu<sup>3</sup>, Liang Kong<sup>3</sup>, Yong Han<sup>1, 4\*</sup>, Lan Zhang<sup>1, 5\*</sup>

<sup>1</sup> State-key Laboratory for Mechanical Behavior of Materials, Xi'an Jiaotong University, Xi'an 710049, China

<sup>2</sup> Department of Osteology, Xi'an People's Hospital (Xi'an No. 4 Hospital), Xi'an 710100, China

<sup>3</sup> State Key Laboratory of Military Stomatology, National Clinical Research Center for Oral Diseases, Shaanxi Clinical Research Center for Oral Diseases, Department of Oral and Maxillofacial Surgery, School of Stomatology, Fourth Military Medical University

<sup>4</sup> Bioinspired Engineering and Biomechanics Center, School of Life Science and Technology, Xi'an Jiaotong University, Xi'an 710049, China

<sup>5</sup> National Center for Translational Medicine (Shanghai) SHU Branch, Shanghai University, 200444, Shanghai, China

#### Experimental methods

In order to examine the HA/ZN interface, the H-180 coating on Zn-1Ca was removed by CrO<sub>3</sub> water solution. In brief, the H-180 sample was immersed into a 20 mg/mL CrO<sub>3</sub> water solution at 70 °C for 2 min to remove the surface coating according to the ASTM standard (Standard Practice for Preparing, Cleaning, and Evaluating Corrosion Test Specimens ASTM (2003), pp. G1-03). Then the exposed surface was examined by FESEM.

In order to know whether HA formation is related to Ca in ZN substrate, the HA nanorods on pure Zn plate treated with same HT process of H-180 were examined. Briefly, pure Zn plates were placed in an aqueous solution containing 0.04M (Ca(CH<sub>3</sub>COO)<sub>2</sub>·H<sub>2</sub>O) in a Teflon-lined autoclave and heated at 110 °C for three hours. Then, they were cleaned by sonication in deionized water for 10 min and hydrothermally treated at 110 °C for three hours in an aqueous solution with 0.167M EDTA-Ca, 0.1M (NH<sub>4</sub>)<sub>2</sub>HPO<sub>4</sub> and adjusted pH of 12.5.

---

\*Corresponding author, e-mail: lan.zhang@mail.xjtu.edu.cn (Lan Zhang), yonghan@mail.xjtu.edu.cn (Yong Han)  
Tel.: +86 02982665580

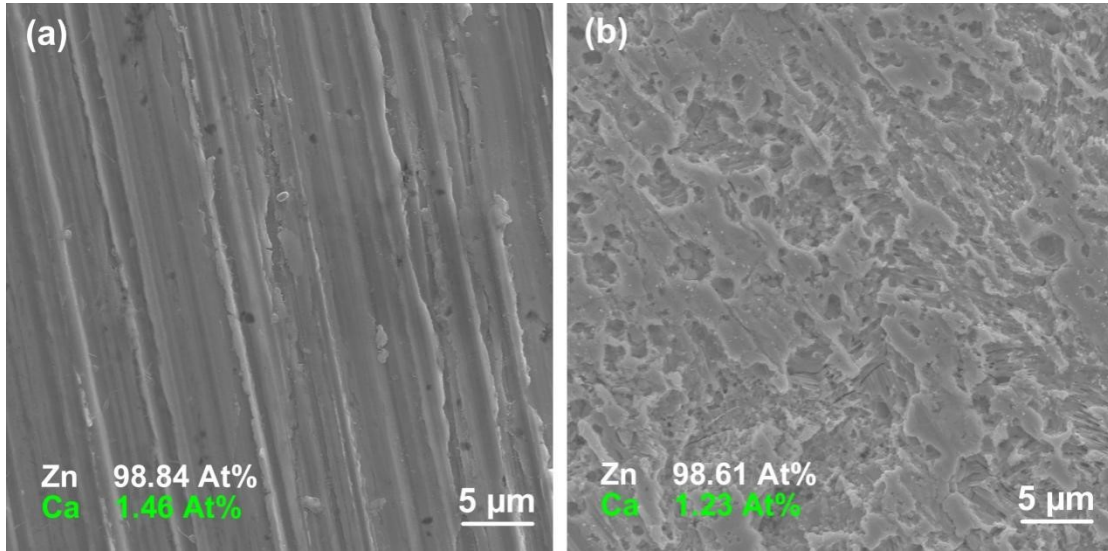

Fig. S1 Surface morphologies and element content of: (a) untreated ZN, and (b) H-180 after removing the surface coating.

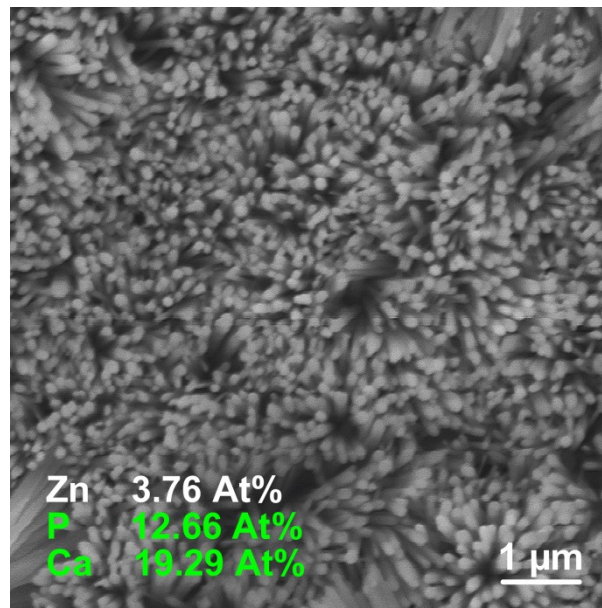

Fig. S2 Surface morphology and element contents of pure Zn after treatment with same process of H-180.
